# Supplementary material for: In-mold lightweight integrating for structural/functional devices
Source: publisher site journal article supplement (doi:10.1515/polyeng-2021-0006), 2021-07-22
Supplement: Supplementary file 1 [file j_polyeng-2021-0006_suppl.docx]

Supplementary material

In-mold lightweight integrating for structural/functional devices

Zhijun Yuan et al.

DOI 10.1515/polyeng-2021-0006


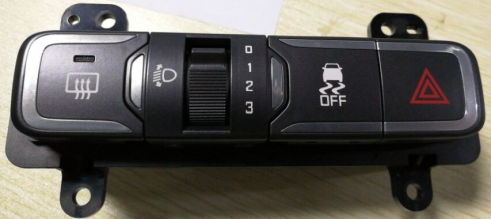


**Supplementary Figure S1:** Mechanical control panel.

**Supplementary Figure S2:** Working principle of the control panel.


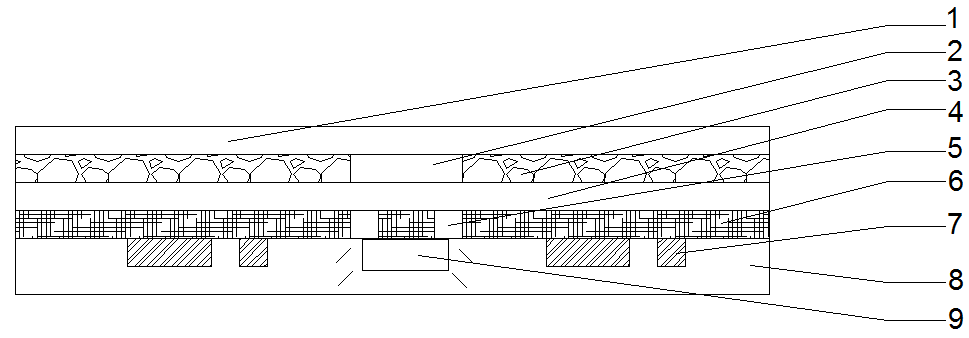


**Supplementary Figure S3:** Structure of the functional film: (1) substrate, (2) transparent region, (3) ink layer, (4) light guide layer, (5) holes, (6) FPCB layer, (7) resistances, (8) injection molded layer, and (9) LED light.

**Supplementary Figure S4:** Functional film: (a) the decoration layer, (b) upper surface of the FPCB layer, and (c) lower surface of the FPCB layer.


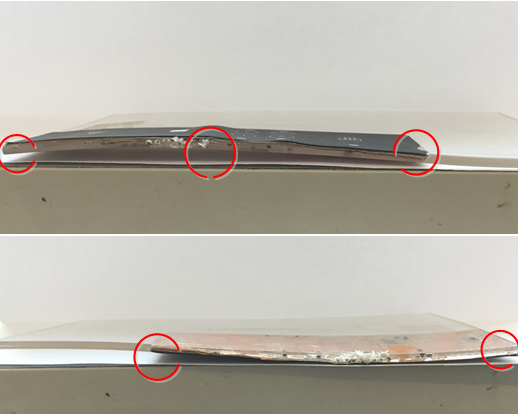


(a)


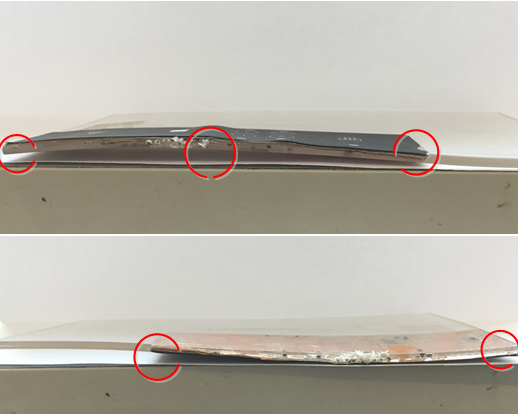


(b)

**Supplementary Figure S5:** A trial with the functional film: (a) top surface, and (b) bottom surface.


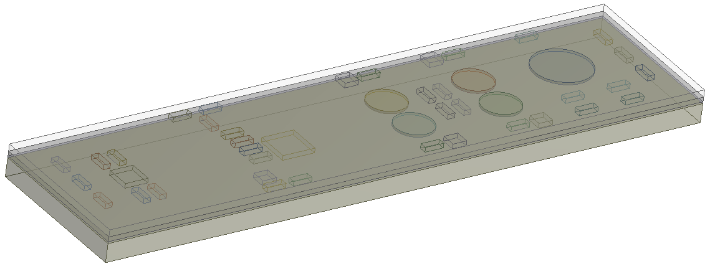


**Supplementary Figure S6:** Designed part.

(a) (b)

**Supplementary Figure S7:** Material properties of the PC/ABS polymer: (a) PVT behavior, and (b) viscosity.

**Supplementary Figure S8:** Injection mold.

**Supplementary Figure S9:** Boundary condition setting for the fluid domain.

**Supplementary Figure S10:** Solid domain.


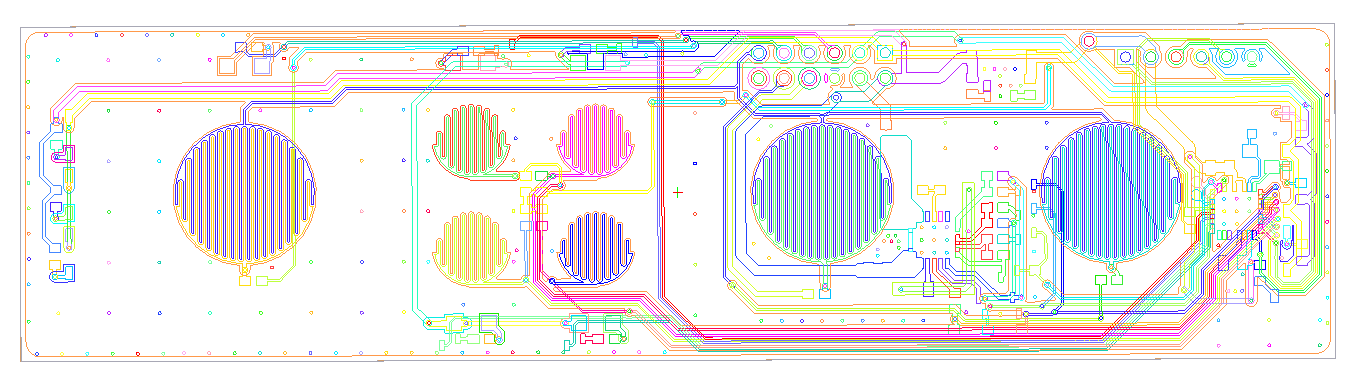


**Supplementary Figure S11:** Model of the FPCB.

**Supplementary Figure S12:** Residual analysis for the warpage regression.

**Supplementary Figure S13:** Flow chart of the genetic algorithm.


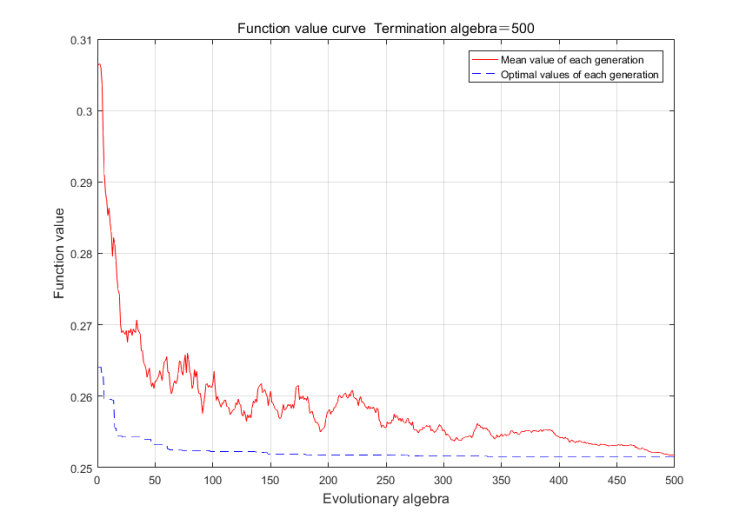


**Supplementary Figure S14:** Solution process of the genetic algorithm.


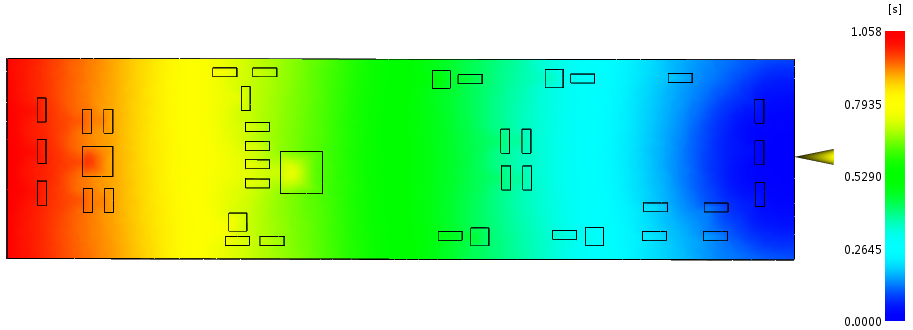


**Supplementary Figure S15:** Filling time of the part.


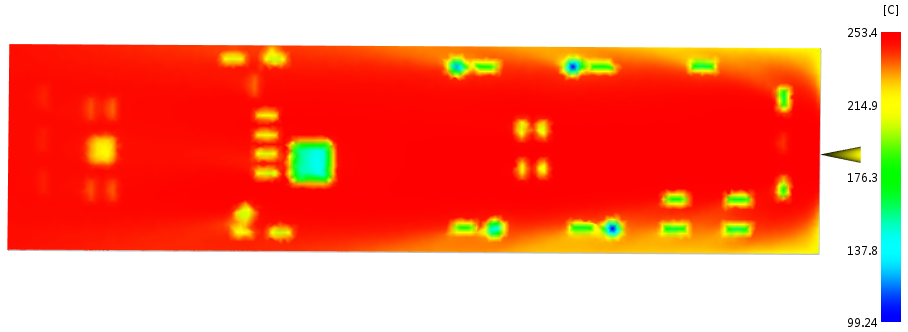


**Supplementary Figure S16:** Temperature distribution at the end of the filling stage.


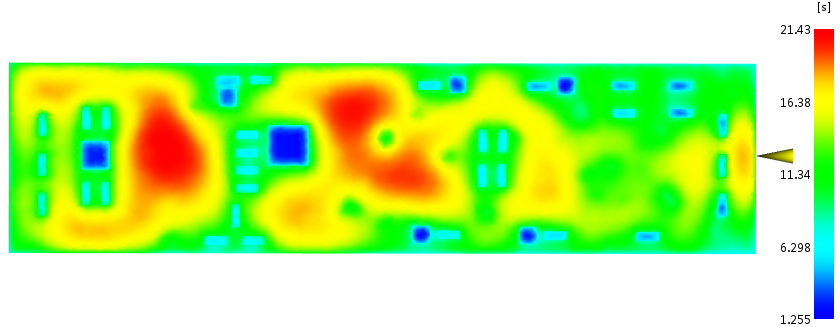


**Supplementary Figure S17:** Ejection time.


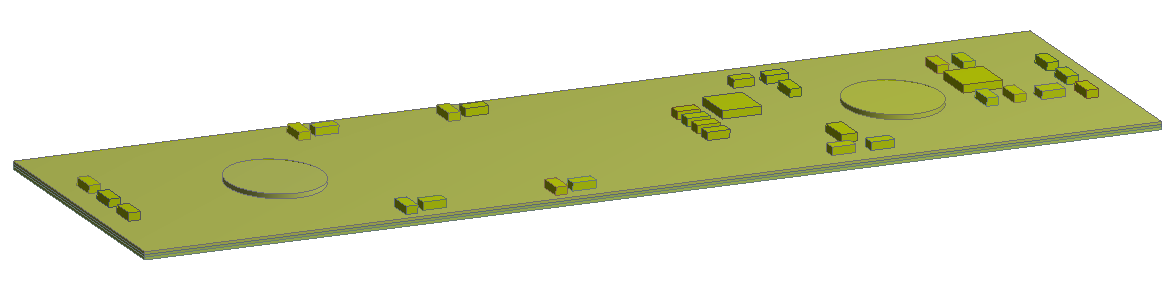


**Supplementary Figure S18:** Functional film encapsulated with cylindrical hats.


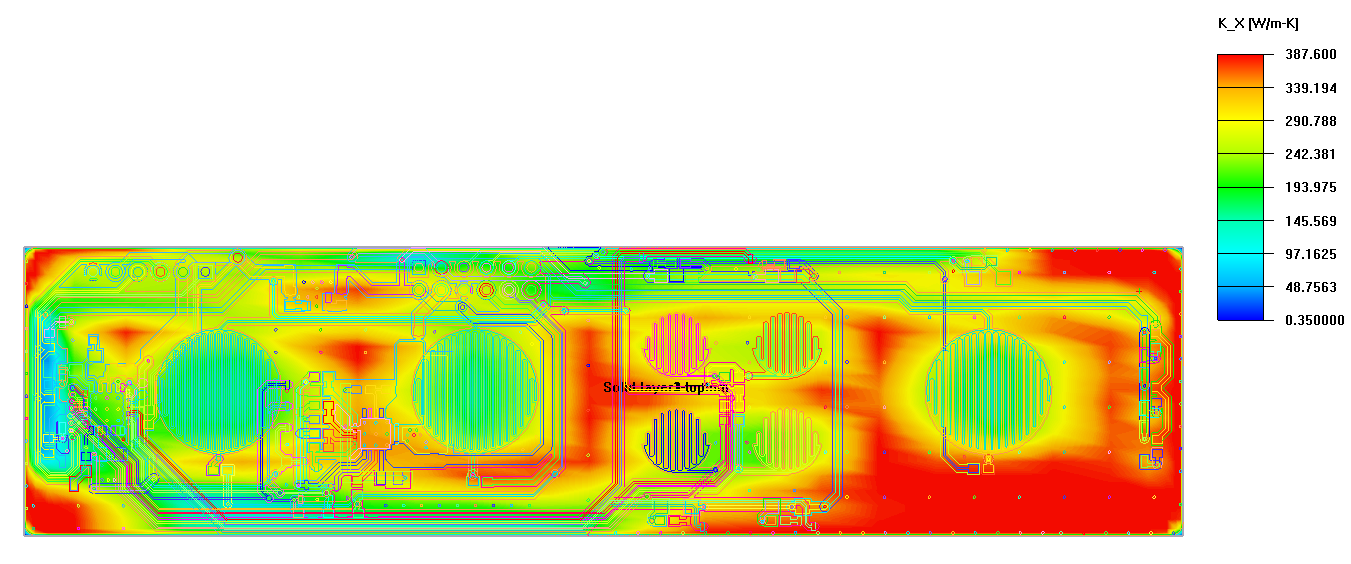


**Supplementary Figure S19:** Thermal conductivity of the FPCB.


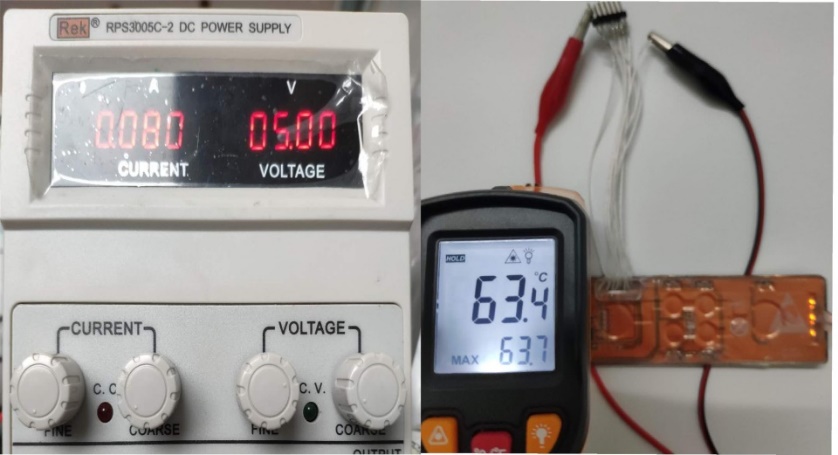


**Supplementary Figure S20:** Lab test of a panel.


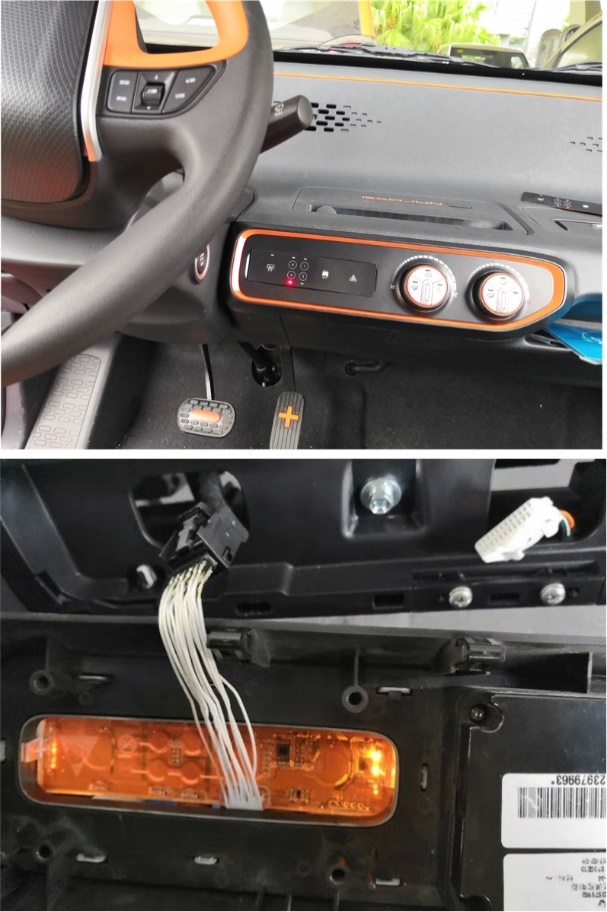

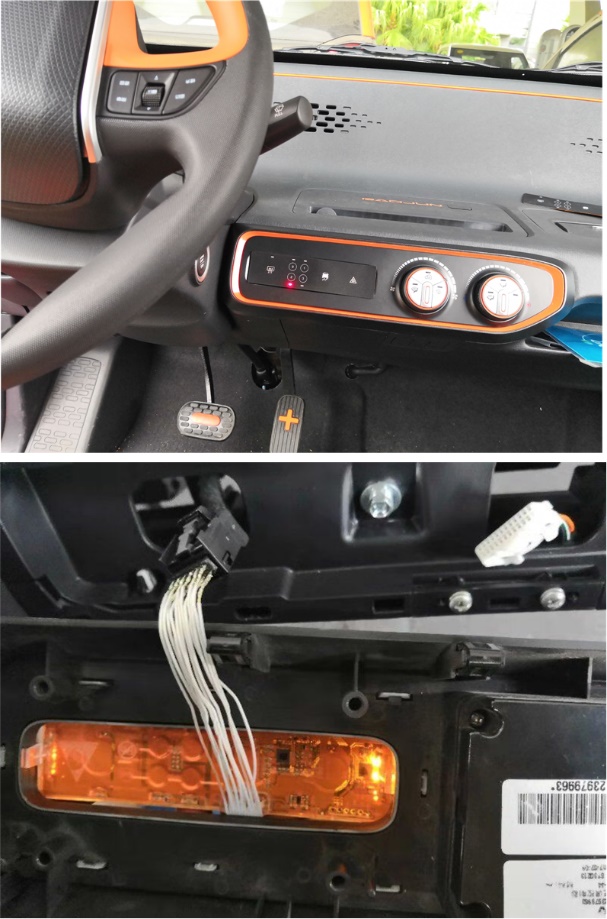


**(a) (b)**

**Supplementary Figure S21:** Installation of a panel in a real vehicle: (a) film surface, and (b) inner surface.

**Supplementary Table S1:** Properties of the PC/ABS polymer.

| **Density** | **Value** | **Mechanical property** | **Value** |
| --- | --- | --- | --- |
| Melt | 1018.9 | Elastic modulus | 2780 MPa |
| Solid | 1121 | Poisson ratio | 0.4 |
|  |  | Shear modulus | 992.9 MPa |

**Supplementary Table S2:** Process parameters.

| **Parameter** | **Value** |
| --- | --- |
| Drying | 4 h @ 90 °C |
| Injection time | 0.8-1.5 s |
| Mold temperature | 40-80 °C |
| Melt temperature | 240-260 °C |
| Holding time | 6-14 s |
| Holding pressure | 40-80 MPa |
| Ejection time | 25 s |

**Supplementary Table S3:** Impact factors and levels of the orthogonal experiment.

| **Levels** | **Impact factors** | | | |
| --- | --- | --- | --- | --- |
| **A, Mold temperature /℃** | **B, Melt temperature /℃** | **C, Holding time /s** | **D, Holding pressure /MPa** |
| 1 | 40 | 240 | 6 | 40 |
| 2 | 50 | 245 | 8 | 50 |
| 3 | 60 | 250 | 10 | 60 |
| 4 | 70 | 255 | 12 | 70 |
| 5 | 80 | 260 | 14 | 80 |

**Supplementary Table S4:** Combinations of impact factors for the orthogonal experiment.

| **NO.** | **A/℃** | **B/℃** | **C/s** | **D/MPa** |
| --- | --- | --- | --- | --- |
| 1 | 40 | 240 | 6 | 40 |
| 2 | 40 | 245 | 8 | 50 |
| 3 | 40 | 250 | 10 | 60 |
| 4 | 40 | 255 | 12 | 70 |
| 5 | 40 | 260 | 14 | 80 |
| 6 | 50 | 240 | 8 | 60 |
| 7 | 50 | 245 | 10 | 70 |
| 8 | 50 | 250 | 12 | 80 |
| 9 | 50 | 255 | 14 | 40 |
| 10 | 50 | 260 | 6 | 50 |
| 11 | 60 | 240 | 10 | 80 |
| 12 | 60 | 245 | 12 | 40 |
| 13 | 60 | 250 | 14 | 50 |
| 14 | 60 | 255 | 6 | 60 |
| 15 | 60 | 260 | 8 | 70 |
| 16 | 70 | 240 | 12 | 50 |
| 17 | 70 | 245 | 14 | 60 |
| 18 | 70 | 250 | 6 | 70 |
| 19 | 70 | 255 | 8 | 80 |
| 20 | 70 | 260 | 10 | 40 |
| 21 | 80 | 240 | 14 | 70 |
| 22 | 80 | 245 | 6 | 80 |
| 23 | 80 | 250 | 8 | 40 |
| 24 | 80 | 255 | 10 | 50 |
| 25 | 80 | 260 | 12 | 60 |

**Supplementary Table S5:** Parameters of the Cross-WLF viscosity model.

|  | / | / | / | / | /- | / |
| --- | --- | --- | --- | --- | --- | --- |
| 0.3392 | 100300 | 2.053×109 | 417.15 | 0 | 20.44 | 51.6 |

**Supplementary Table S6:** Material properties of the structure.

|  | **Material** | **Density**  **/** | **Elastic modulus /** |  | **Poisson ratio**  **/-** | **Heating power**  **/**W | **Thermal conductivity**  **/** | **Specific heat**  **/** |
| --- | --- | --- | --- | --- | --- | --- | --- | --- |
| LED | Epoxy | 1120 |  |  | 0.38 | 0.06 | 0.55 | 550 |
| Resistor | Ceramic | 3970 |  |  | 0.26 | 0.1 | 15 | 800 |
| Chip | Epoxy | 1120 |  |  | 0.38 | 0.0054 | 0.2 | 550 |
| Film | FPCB | 3839 |  |  | 0.34 | - | 0.25 | 420 |
| Injection molded layer | PC/ABS | 1121 |  |  | 0.4 | - | 0.18 | 2310 |
| Decoration layer & light guide layer | PC | 1198 |  |  | 0.417 | - | 0.26 | 1250 |
| Mold | Steel | 7850 |  |  | 0.30 | - | 29 | 460 |

**Supplementary Table S7:** Calculated warpage deformation results.

| **NO.** | **A**  **/℃** | **B**  **/℃** | **C**  **/s** | **D**  **/MPa** | **W**  **/mm** |
| --- | --- | --- | --- | --- | --- |
| 1 | 40 | 240 | 6 | 40 | 1.0900 |
| 2 | 40 | 245 | 8 | 50 | 1.1320 |
| 3 | 40 | 250 | 10 | 60 | 1.2020 |
| 4 | 40 | 255 | 12 | 70 | 1.2970 |
| 5 | 40 | 260 | 14 | 80 | 1.4210 |
| 6 | 50 | 240 | 8 | 60 | 1.1010 |
| 7 | 50 | 245 | 10 | 70 | 1.1790 |
| 8 | 50 | 250 | 12 | 80 | 1.2820 |
| 9 | 50 | 255 | 14 | 40 | 1.1250 |
| 10 | 50 | 260 | 6 | 50 | 1.1700 |
| 11 | 60 | 240 | 10 | 80 | 1.1240 |
| 12 | 60 | 245 | 12 | 40 | 1.0580 |
| 13 | 60 | 250 | 14 | 50 | 1.1040 |
| 14 | 60 | 255 | 6 | 60 | 1.1080 |
| 15 | 60 | 260 | 8 | 70 | 1.2200 |
| 16 | 70 | 240 | 12 | 50 | 0.9885 |
| 17 | 70 | 245 | 14 | 60 | 0.9803 |
| 18 | 70 | 250 | 6 | 70 | 1.0610 |
| 19 | 70 | 255 | 8 | 80 | 1.1900 |
| 20 | 70 | 260 | 10 | 40 | 1.0440 |
| 21 | 80 | 240 | 14 | 70 | 0.8980 |
| 22 | 80 | 245 | 6 | 80 | 0.9596 |
| 23 | 80 | 250 | 8 | 40 | 0.9544 |
| 24 | 80 | 255 | 10 | 50 | 0.9390 |
| 25 | 80 | 260 | 12 | 60 | 1.0120 |

**Supplementary Table S8:** Analysis of variance for the regression.

| **Source** | **Degree of freedom** | **Adj SS*** | **F-value** | **P-value** |
| --- | --- | --- | --- | --- |
| Model | 15 | 0.360906 | 26.09 | <0.0001 |
| A | 1 | 0.001199 | 1.30 | 0.284 |
| B | 1 | 0.001362 | 1.48 | 0.255 |
| C | 1 | 0.000967 | 1.05 | 0.332 |
| D | 1 | 0.001713 | 1.86 | 0.206 |
| AB | 1 | 0.001216 | 1.32 | 0.280 |
| AC | 1 | 0.000974 | 1.06 | 0.331 |
| AD | 1 | 0.001606 | 1.74 | 0.220 |
| BC | 1 | 0.000998 | 1.08 | 0.325 |
| BD | 1 | 0.001748 | 1.90 | 0.202 |
| CD | 1 | 0.001114 | 1.21 | 0.300 |
| ABC | 1 | 0.000989 | 1.07 | 0.327 |
| ABD | 1 | 0.001627 | 1.76 | 0.217 |
| ACD | 1 | 0.001173 | 1.27 | 0.289 |
| BCD | 1 | 0.001179 | 1.28 | 0.287 |
| ABCD | 1 | 0.001205 | 1.31 | 0.283 |
| Error | 9 | 0.008299 | - | - |
| Total | 24 | 0.369205 | - | - |

*Adj SS: Ajusted sum of squares.

***Code***

The UDF for the Cross-WLF viscosity model was implemented, and was imported into the FLUENT module by the interpretation model. The implementation is shown below.

//udf for the Cross-WLF viscosity model

#include "udf.h"

real n = 0.3392;

real taos = 100300;

real D1 = 2.053e9;

real D2 = 417.15;

real D3 = 0.0;

real A1 = 20.44;

real A2s= 51.6;

DEFINE_PROPERTY(cell_viscosity, cell, thread)

{

real ita;

real gama;

real Ts;

real A2;

real p;

real ita0;

real T;

T = 273.15 + 240;//C_T(cell, thread);

p = C_P(cell, thread);

Ts = D2 + D3 * p;

A2 = A2s + D3 * p;

ita0 = D1 * exp(-A1*(T - Ts)/(A2 + (T - Ts)));

gama = C_STRAIN_RATE_MAG(cell,thread); //shear rate

ita = ita0/(1 + pow((gama/taos),1.0 - n));

//if (cell < 10)

//{

// printf("gama:%f\n",gama);

// printf("ita:%f\n",ita);

//}

return ita;

}
